# Supplementary material for: The CEACAM1 tumor suppressor is an ATM and p53-regulated gene required for the induction of cellular senescence by DNA damage
Source: PubMed Central journal article supplement — Oncogenesis. 2012 Apr 16;1(4):e7–. doi: 10.1038/oncsis.2012.7 (PMC3412640; doi:10.1038/oncsis.2012.7), 2012-04-16
Supplement: oncsis20127x2.pdf [file oncsis20127x2.pdf]

**Table SI.**

*Number of colonies 7 days after treatment.*

**MCF-10A stable transfectants**

| <b><u>Experiment 1.</u></b>             | <b>DMSO</b>           | <b>Etoposide 20<math>\mu</math>M</b> | <b>% colonies (vs DMSO)</b>           |
|-----------------------------------------|-----------------------|--------------------------------------|---------------------------------------|
| <b>MCF-10A<sup>CTRL</sup></b>           | <b>244</b>            | <b>13</b>                            | <b>5.3</b>                            |
| <b>MCF-10A<sup>CEACAM1-KD 025</sup></b> | <b>317</b>            | <b>55</b>                            | <b>17.3</b>                           |
| <b>MCF-10A<sup>CEACAM1-KD 026</sup></b> | <b>273</b>            | <b>40</b>                            | <b>14.6</b>                           |
| <br>                                    |                       |                                      |                                       |
| <b><u>Experiment 2.</u></b>             | <b>DMSO</b>           | <b>Etoposide 20<math>\mu</math>M</b> | <b>% colonies (vs DMSO)</b>           |
| <b>MCF-10A<sup>CTRL</sup></b>           | <b>324</b>            | <b>50</b>                            | <b>15.4</b>                           |
| <b>MCF-10A<sup>CEACAM1-KD 025</sup></b> | <b>361</b>            | <b>142</b>                           | <b>39.3</b>                           |
| <b>MCF-10A<sup>CEACAM1-KD 026</sup></b> | <b>291</b>            | <b>95</b>                            | <b>32.6</b>                           |
| <br>                                    |                       |                                      |                                       |
| <b><u>Experiment 3.</u></b>             | <b>H<sub>2</sub>O</b> | <b>NCS 1.47nM</b>                    | <b>% colonies (vs H<sub>2</sub>O)</b> |
| <b>MCF-10A<sup>CTRL</sup></b>           | <b>372</b>            | <b>6</b>                             | <b>1.6</b>                            |
| <b>MCF-10A<sup>CEACAM1-KD 025</sup></b> | <b>408</b>            | <b>31</b>                            | <b>7.6</b>                            |
| <b>MCF-10A<sup>CEACAM1-KD 026</sup></b> | <b>358</b>            | <b>19</b>                            | <b>5.3</b>                            |

| <u>Experiment 4.</u>              | H <sub>2</sub> O | NCS 1.47nM | % colonies (vs H <sub>2</sub> O) |
|-----------------------------------|------------------|------------|----------------------------------|
| MCF-10A <sup>CTRL</sup>           | 167              | 24         | 14.7                             |
| MCF-10A <sup>CEACAM1-KD 025</sup> | 437              | 185        | 42.2                             |
| MCF-10A <sup>CEACAM1-KD 026</sup> | 358              | 153        | 42.7                             |

HCT116 stable transfectants

| <u>Experiment 1.</u>             | DMSO | Etoposide 20μM | % colonies (vs DMSO) |
|----------------------------------|------|----------------|----------------------|
| HCT116 <sup>CTRL</sup>           | 301  | 12             | 4.0                  |
| HCT116 <sup>CEACAM1-KD 026</sup> | 325  | 28             | 8.6                  |

| <u>Experiment 2.</u>             | DMSO | Etoposide 20μM | % colonies (vs DMSO) |
|----------------------------------|------|----------------|----------------------|
| HCT116 <sup>CTRL</sup>           | 257  | 6              | 2.3                  |
| HCT116 <sup>CEACAM1-KD 026</sup> | 264  | 28             | 10.6                 |

| <u>Experiment 3.</u>             | DMSO | Etoposide 20μM | % colonies (vs DMSO) |
|----------------------------------|------|----------------|----------------------|
| HCT116 <sup>CTRL</sup>           | 293  | 1              | 0.3                  |
| HCT116 <sup>CEACAM1-KD 026</sup> | 324  | 31             | 9.7                  |
| HCT116 <sup>CEACAM1-KD 028</sup> | 244  | 15             | 6.3                  |

| <u>Experiment 4.</u>             | DMSO | Etoposide 20 $\mu$ M | % colonies (vs DMSO) |
|----------------------------------|------|----------------------|----------------------|
| HCT116 <sup>CTRL</sup>           | 167  | 2                    | 1.2                  |
| HCT116 <sup>CEACAM1-KD 026</sup> | 266  | 15                   | 5.6                  |
| HCT116 <sup>CEACAM1-KD 028</sup> | 177  | 6                    | 3.4                  |
